# Supplementary material for: Effect of Pain Reprocessing Therapy vs Placebo and Usual Care for Patients With Chronic Back Pain: A Randomized Clinical Trial
Source: PubMed Central journal article supplement (PMC8482298; doi:10.1001/jamapsychiatry.2021.2669), 2021-09-29
Supplement: jamapsychiatry-e212669-s003.pdf [file jamapsychiatry-e212669-s003.pdf]

## Data Sharing Statement

Ashar. Effect of Pain Reprocessing Therapy vs Placebo and Usual Care for Patients With Chronic Back Pain. *JAMA Psychiatry*. Published September 29, 2021.

doi:10.1001/jamapsychiatry.2021.2669

### Data

**Data available:** Yes

**Data types:** Deidentified participant data

**How to access data:** De-identified patient-reported outcomes and single-subject fMRI statistical parameter maps will be shared via figshare:

<https://figshare.com/s/1840dc4c0e236a7072ca>

**When available:** With publication

### Supporting Documents

**Document types:** None

### Additional Information

**Who can access the data:** public

**Types of analyses:** for any purpose

**Mechanisms of data availability:** publicly available
